# Supplementary material for: Combined application of Online FIGAERO-CIMS and Offline LC-Orbitrap MS to Characterize the Chemical Composition of SOA in Smog Chamber Studies
Source: Copernicus journal article supplement (doi:10.5194/amt-2021-420), 2021-12-20
Supplement: Supplementary file [file amt-2021-420-AC2-supplement.pdf]

(Shilling et al., 2009)

Atmos. Meas. Tech. Discuss., referee comment RC2  
<https://doi.org/10.5194/amt-2021-420-RC2>, 2022  
© Author(s) 2022. This work is distributed under the Creative  
Commons Attribution 4.0 License.

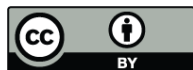

## Comment on amt-2021-420

Anonymous Referee #2

---

Referee comment on "Combined application of Online FIGAERO-CIMS and Offline LC-Orbitrap MS to Characterize the Chemical Composition of SOA in Smog Chamber Studies" by Mao Du et al., Atmos. Meas. Tech. Discuss.,  
<https://doi.org/10.5194/amt-2021-420-RC2>, 2022

---

The manuscript titled "Combined application of Online FIGAERO-CIMS and Offline LC-Orbitrap MS to Characterize the Chemical Composition of SOA in Smog Chamber Studies" by Du and Co-authors characterizes the chemical composition of SOA using a combination of two state-of-the-art mass spectrometry techniques: FIGAERO-CIMS (online), and LC-Orbitrap (offline). The chemical system analyzed is the photooxidation of  $\alpha$ -pinene using an atmospheric chamber. The authors use hierarchical clustering of the time series of gas-phase and particle-phase oxidation products to get an insight into the phase partitioning of individual molecular compositions and to inform the targeted analysis for the LC orbitrap.

The distribution of particle-phase products is found broadly similar between the FIGAERO-CIMS and LC-Orbitrap MS negative ionization mode.

The hierarchical clustering analysis allowed the identification of cluster properties in terms of average carbon number, oxygen number, oxidation states, for example, enabling interpretation in terms of possible termination pathways of peroxy radicals in the  $\alpha$ -pinene photooxidation reactions.

Saturation concentrations of compounds ( $C^*$ ) were carried out using the FIGAERO CIMS and LC orbitrap independently. The substantial differences resulting from the two approaches indicate that further work is required to investigate  $C^*$ .

The article is well written and presents an interesting and substantial amount of work that is very relevant, of high interest for the scientific community, and well in line with the journal scope.

I recommend publication after the following minor revisions.

We thank the reviewer for your time and effort to provide comments/suggestions on our work. Your contribution is much appreciated.

Please find the following replies to each one of the comments/suggestions. For clarity, we kept the reviewer's comment in black. Our answers were marked in deep blue and changes to the manuscript were in deep blue and Italic. Line numbers in the responses refer to the

revised manuscript.

Line 161: “The ... 80C”. “relativity” should be “relative” and it should be in the past tense, not future.

It has been changed into ‘relative’. The tense has been changed to the past. The sentence is shown here for your convenience.

*‘The relative humidity in the chamber was adjusted by the custom-built humidifier which comprises a 50L tank fed with ultra-pure water (resistivity  $\geq 18.2 \text{ M}\Omega\text{-cm}$ ), generating water vapour using an immersion heater that heats the water to  $\sim 80^\circ\text{C}$ .’*

Line 183: “the filters ... contaminants”. It would be good to add a sentence about how (or if?) this process was quantified as well some more information about the loading of the filters.

The following sentence was added in the L194-196th in the manuscript. *‘The chemical composition of filters was characterized and expressed as peak area through the offline LC-MS analysis. The ratio of largest residual contaminant that was removed from the sample by the blank subtraction is 188, indicating the much lower loading of blank filters after the pre-treatment.’*

Line 202: “characterized for 30 mins” this is unclear. I recommend changing/expanding the sentence to better explain what that entails.

we rephrased this sentence. It reads as from Line 209th *‘Gas-phase species are sampled via a 0.5 m  $\frac{1}{4}$ ” I.D. PFA tubing at 1 standard litre per minute (SLM) from the chamber. The gas sampling was performed for 30 mins.’*

Line 210: “The gas-phase data ... chamber background”. This is unclear. Please change/extend the sentence to explain what the authors mean. The first measurements were used to correct gas-phase data for the background?

Yes, the first measurements were used to correct gas-phase measurement data. In L213th, it was stated that *‘the first cycle in the cleaned chamber condition’*. And therefore, the data collected during this period were considered as the chamber background. In order to make it clearer, we adjusted the sequence of the description of gas-phase background correction. It read as:

*‘Six gas phase and particle phase cycles were carried out during each experiment. The sample blanks were collected by two additional gas and particle-phase cycles before the initiation of photooxidation. The first cycle was conducted in the clean chamber condition before injection of reactants. This was followed by the second cycle after all species (VOC, seeds and NO<sub>x</sub>) had been injected. The gas-phase data collected in the first cycle was employed for the gas-phase “chamber background”. The instrument was flushed with ultra-high purity nitrogen (UHP, 99.999% purity, N<sub>2</sub>) for 0.2 min every 2 min during each gas-phase measurement, which acted as the gas-phase “instrument background”. To remove the influence of the seed particles, the particle-phase data collected in the second cycle were used as the particle-phase background correction.’*

Line 453: “5.5 hours into the photochemistry experiment.” Please add why 5.5 hours was chosen.

In each experiment, the chamber was irradiated for 6 hours after injection of reactants. It was stated in L210th in section 2.2.1 that there were six gas and particle phases over the experiments (0.5h, 1.5h, 2.5h, 3.5h, 4.5h, 5.5h) for online FIGAERO-CIMS measurements, as shown in Figure 1. It can be seen that the 5.5 hour point was the end of the last cycle of gas-phase measurement and commencement of the final cycle of particle-phase

measurements for the online FIGAERO-CIMS measurements. As stated in the manuscript, particles were collected onto the filter in the previous gas-phase measurements, thus the particles analysed started from 5.5 hour and were collected from 5.0 to 5.5 hours. Meanwhile, the filters employed for offline LC-MS analysis were collected from the chamber after 6-hour reactions. In our study, the 5.5 hours is the final cycle for the FIGAERO-CIMS measurements, so it was chosen to compare with the results from the offline analysis. We changed the description as below:

*‘Offline filters characterized by LC-Orbitrap MS are shown in Fig 2 from negative and positive ionization mode alongside the last cycle of gas and particle-phase measurements (5.5 hours after lights on ) by the CIMS’*

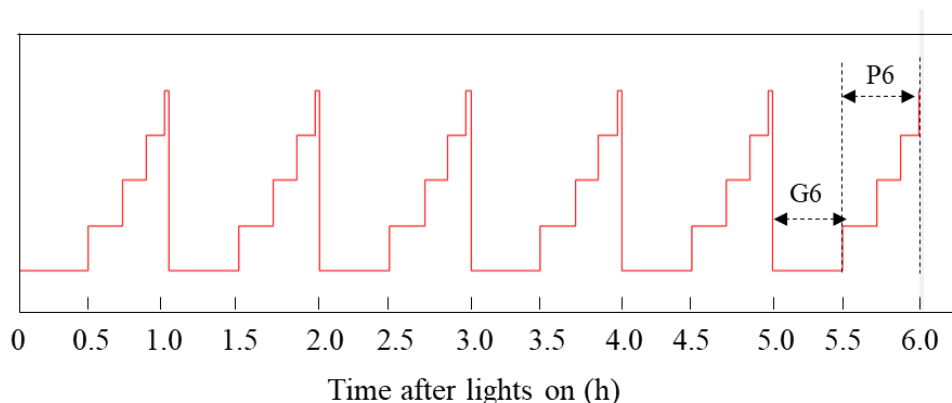

Figure 1. Gas and particle cycles of FIGAERO-CIMS over the 6 hour experiments.

Line 529-532: “Figure 4a. photooxidation”. The sentence is unclear. “increasing over time” seems to be referred to the gas phase. Please rephrase to make sure the reader does not get confused.

It has been changed into: *‘Figure 4a shows that the gas-phase products are initially dominated by CHON species at the beginning, with a decreasing trend in relative contribution over time. In Figure 4b, CHO species are shown to dominate in the particle phase, increasing over time in relative contribution, plateauing after 2.5-h into the experiment.’*

Figure S3: the x-axis labels are not legible because are too crowded. Please modify the graph to make them legible (have only a subset?) or remove them if they are not necessary to understand the graph.

We think it would be better to remove it, as the molecules information of each cluster was included in Table S2-S4.

The figures’ sequence in the manuscript and SI was also adjusted.

Line 734: “instrumental sensitivity needs more effort” this sentence is unclear. Do the authors mean that the sensitivity needs to improve?

We thank the reviewer for pointing this out. We agree that this sentence was not clear. The last paragraph has been changed into *‘The selectivity and instrumental sensitivity make it impossible to use one instrument to capture all oxidation products, thus it strongly recommends the combination of instruments in order to better explore the evolution of SOA chemical composition. Additionally, future work will report SOA oxidation products and their chemical properties from more complex systems utilizing the analytical approaches from the two instruments, such as the chamber photo-oxidation of anthropogenic VOCs or biogenic and anthropogenic mixtures of VOCs (Voliotis et al., 2022). As this study only assessed a single  $\alpha$ -pinene photooxidation system, more work is needed to evaluate how*

*those analytical methods from the two instruments perform with other systems.'*

Figure 5: I recommend adding “Gas-phase” somewhere on the plot.

The ‘Gas phase’ has been added in Figure 5.

Figure 6: I recommend adding “Particle phase” and “FIGAERO CIMS” somewhere on the plot.

The ‘Particle-phase’ has been added in Figure 6.

## **Reference:**

Shilling, J. E., Chen, Q., King, S. M., Rosenoern, T., Kroll, J. H., Worsnop, D. R., DeCarlo, P. F., Aiken, A. C., Sueper, D., Jimenez, J. L., and Martin, S. T.: Loading-dependent elemental composition of  $\alpha$ -pinene SOA particles, *Atmospheric Chemistry and Physics*, 9, 771-782, 10.5194/acp-9-771-2009, 2009.

Voliotis, A., Du, M., Wang, Y., Shao, Y., Alfarra, M. R., Bannan, T. J., Hu, D., Pereira, K. L., Hamilton, J. F., Hallquist, M., Mentel, T. F., and McFiggans, G.: Chamber investigation of the formation and transformation of secondary organic aerosol in mixtures of biogenic and anthropogenic volatile organic compounds, *Atmospheric Chemistry and Physics Discussions*, 10.5194/acp-2021-1080, 2022.
